1 High amino-acid intake in early life is associated with systolic but not diastolic  
2 arterial hypertension at 5-years of age in children born very preterm.

3  
4 Jean-Christophe Rozé, MD, PhD<sup>1,7</sup>

5 Justine Bacchetta, MD, PhD<sup>2</sup>

6 Alexandre Lapillonne, MD, PhD<sup>3</sup>

7 Farid Boudred MD, PhD<sup>4</sup>

8 Jean-Charles Picaud, MD, PhD<sup>5</sup>

9 Laetitia Marchand-Martin, MsC<sup>6</sup>

10 Alexandra Bruel-Tessoulin, MD<sup>7</sup>

11 Jérôme Haramba, MD, PhD<sup>8</sup>

12 Valérie Biran, MD, PhD<sup>9</sup>

13 Dominique Darmaun, MD, PhD<sup>10</sup>

14 Pierre-Yves Ancel, MD, PhD<sup>6</sup>

15

16 1. Department of Neonatal Medicine, Nantes University Hospital, Nantes, France

17 2. Reference Centre for Rare Kidney Diseases, INSERM 1033 Research Unit, Hospices Civils de Lyon, Lyon 1 University,  
18 France

19 3. Department of Neonatal Medicine, Assistance Publique Hopitaux de Paris, Necker Enfants Malades Hospital, Paris, France

20 4. Department of Neonatology, Faculté de Médecine, Aix-Marseille Université, Marseille, France

21 5. Department of Neonatology, Hospices Civils de Lyon, Lyon, France and Laboratoire CarMen, INSERM, INRA, Université  
22 Claude Bernard Lyon1, Pierre-Bénite, F69310, France

23 6. Université Paris Cité, Sorbonne Paris-Nord, Inserm, INRAE, CRESS, Obstetrical Perinatal and Pediatric Epidemiology  
24 Research Team, EPOPé, F-75006 Paris, France

25 7. Pediatric Nephrology Unit, Department of Pediatrics, Nantes University Hospital, Nantes, France

26 8. Pediatric Nephrology Unit, Department of Pediatrics, Bordeaux University Hospital, Bordeaux, France.

27 9. Neonatal Intensive Care Unit, Assistance Publique-Hôpitaux de Paris, Robert Debré Children's Hospital, Paris, France

28 10. UMR 1280, INRAE-Nantes Université, Nantes, France

29

31

32

33 Corresponding author:

34 Jean-Christophe Rozé, coordinator of EPIPAGE 2 nutrition study group

35 University Hospital of Nantes, Nantes University

36 Address: 36 Boulevard Jean Monnet, 44093 Nantes, France.

37 Tel: +33 6 25 92 58 45

38 Email: [jean-christophe.roze@inserm.fr](mailto:jean-christophe.roze@inserm.fr)

39

40 **ABSTRACT (378 words)**

41 **BACKGROUND.** The life course of individuals born very premature is a topic of increasing concern  
42 as their neonatal survival has dramatically increased. In a national, prospective, population-based birth  
43 cohort, EPIPAGE-2, we observed that amino-acid intakes greater than 3.5 g/kg/day at day 7 after birth  
44 were independently associated with higher intelligence quotient at 5 years. As the association between  
45 high early amino-acid intake and later HBP in this population is debated, we assessed blood pressure  
46 (BP) at 5 years.

47 **METHODS.** This cohort was initiated in 2011, and approved by ethics committees. Eligible infants  
48 were those born between 24 and 29 weeks of gestation and alive on day7 after birth. Infants were  
49 distributed in two groups of 717 infants matched on propensity score on whether or not they were  
50 exposed to high amino-acid intake (>3.5 g/kg/d at Day7); 455 control term infants were also enrolled.  
51 Assessment at 5-year occurred from September 2016 to December 2017. A value  $\geq 95^{\text{th}}$  percentile of  
52 reference values for age and height defined systolic and/or diastolic HBP.

53 **RESULTS.** BP at five years of age was assessed for 389 and 385 children in exposed and non-  
54 exposed groups. Rates (%) of systolic HBP were 18.0% (95%CI, 14.5 to 22.2), 13.3% (95%CI, 10.3 to  
55 17.0), and 8.5% (95%CI, 6.5 to 11.1) in exposed, non-exposed preterm infants, and term infants,  
56 respectively; and 9.0% (95%CI, 6.6 to 12.3), 10.2% (95%CI, 7.5 to 13.6), 5.4% (95%CI, 3.8 to 7.6) %  
57 for diastolic HBP, in exposed, non-exposed and term-born groups, respectively. Perinatal  
58 characteristics of exposed and non-exposed infants were similar, except for nutrition intake at day3  
59 and day7 after birth. Exposure to high early amino-acid intake, and maximal serum creatinine between  
60 day3 and day7 were two independent risk factors for systolic HBP (aOR, 1.60 [95% CI, 1.05 to 2.43]  
61 and aOR, 1.59 [95% CI, 1.12 to 2.26] by 50  $\mu\text{mol/L}$ , respectively) but not for diastolic HBP (aOR,  
62 0.84 [95% CI, 0.50 to 1.39] and aOR, 1.09 [95% CI, 0.71 to 1.67] by 50  $\mu\text{mol/L}$ , respectively).

63 **CONCLUSIONS.** These observations confirm the risk for HBP in young children born very preterm.  
64 Higher amino-acid intake and creatinine values in the first week of life were associated with childhood  
65 systolic HBP. These results suggest that mechanisms to childhood systolic HBP involves neonatal  
66 renal challenge by high amino-acid intake or dysfunction.

67

68

## 69 INTRODUCTION

70 The life course of individuals born very premature has become a topic of increasing importance as  
71 their survival beyond neonatal period has dramatically increased over the last few decades. The risk  
72 for developing systemic arterial high blood pressure (HBP) is increased in this population, but the  
73 underlying mechanism(s) are poorly understood.<sup>1,2,3</sup>

74

75 Epidemiologic evidence suggests early increased amino-acid intake could be associated with later HBP  
76 in general population. This association could be mediated by altered kidney function.<sup>4</sup> Literature  
77 suggests postnatal nutritional intakes could be determinants of later high blood pressure at 6.5 years of  
78 age in infants born very preterm as well.<sup>5</sup> Concerns have been raised that not only low intakes but also  
79 high intakes in infancy might contribute to higher blood pressure and increased cardiovascular risk  
80 later in life in this high-risk population.<sup>6</sup>

81

82 In a birth national prospective population-based cohort, (*Etude Epidémiologique sur Petits Ages*  
83 *Gestationnels* [EPIPAGE-2]), we observed that amino acid intake, above 3.5g/kg/day at day 7 after  
84 birth, was independently associated with higher intelligence quotient at 5 years in a propensity score  
85 matched cohort.<sup>7</sup> As the association between high early amino-acid intake and later HBP is debated in  
86 this population, we assessed BP at 5-year in this matched cohort.

87

## 88 METHODOLOGY

### 89 Study Population

90 Very preterm were enrolled in EPIPAGE 2 cohort. Recruitment took place at birth in all NICUs in France from  
91 April 1st to December 31th, 2011. Eligible children were those born between 24+0 and 29+6 weeks+days of  
92 gestation, admitted to the NICU, alive at 7 days after birth, and with information available regarding amino acid  
93 intake at 7 days after birth. Baseline characteristics at birth and during the first week, as well as the maximum  
94 creatinine value obtained between day 3 and day 7 after birth. were prospectively recorded during neonatal  
95 hospitalization. Children were followed from September 1, 2016, to December 31, 2017. The study was  
96 approved by the National Data Protection Authority, the Consultative Committee on the Treatment of  
97 Information on Personal Health Data for Research Purposes, and the Committee for the Protection of People  
98 Participating in Biomedical Research.<sup>8</sup>

99 Term born children were from the ELFE (*Étude Longitudinale Française depuis l'Enfance*) cohort,  
100 followed with the EPIPAGE-2 follow-up protocol. The ELFE cohort is a contemporary French cohort of  
101 more than 18000 children born in 2011, in 344 randomly selected public and private maternity units in

102 metropolitan France.<sup>9</sup> Recruitment and data collection occurred only after families had received information  
103 and provided oral informed consent to participate in the study. This study followed the Strengthening the  
104 Reporting of Observational Studies in Epidemiology (STROBE) reporting guideline for cohort studies.

105

#### 106 [Amino Acid Intake at 7 Days After Birth](#)

107 Preterm infants were separated into 2 groups, exposed and nonexposed, based on whether they had been  
108 prescribed a high amino acid intake (defined as 3.51-4.50 g/kg/d at 7 days after birth), as recommended in 2011  
109 on physiological basis,<sup>10</sup> by the American National Institute of Child Health and Human Development,<sup>11</sup> the  
110 European Society of Paediatric Gastroenterology, Hepatology and Nutrition.<sup>12</sup> In the EPIPAGE-2 study,  
111 information about nutritional intake was recorded at days 3, 7, and 28 and at hospital discharge. All data  
112 were prospectively collected during NICU hospitalization.

113

#### 114 [Outcomes](#)

115 The primary outcomes were systolic and diastolic HBP defined as a value > 95th percentile of reference values for  
116 age and height.<sup>13</sup> The secondary outcomes were systolic and diastolic BP considered as continuous variables.  
117 Standard operating procedures were used for resting BP measurements.<sup>14,15</sup> Blood pressure (mmHg) was measured  
118 noninvasively during an outpatient visit at 5 years of age by automatic oscillometer with a blood pressure monitor  
119 or with a manual sphygmo-manometers. Children were seated in a quiet examination room for at least 5 minutes  
120 before BP assessment. All BPs were assessed by trained, certified staff and done in agreement with Fourth Task  
121 Force recommendations of technique and cuff sizes.<sup>14</sup> Three consecutive BP measurements were performed 2  
122 minutes apart. The reported value was the mean of the 2 closer values. If only 2 measurements were performed,  
123 the reported value was the mean of these two values. In case of only one measurement, this value was reported. Z-  
124 score of weight at 5-year were based on WHO curves.

125

#### 126 [Statistical Analysis](#)

127 The main analysis included 1789 children born preterm with complete data. We analyzed the  
128 association between the exposure and the primary outcome using a propensity score approach<sup>16</sup> to control for  
129 observed confounding factors that might have consequences for both group assignment (exposed vs

130 nonexposed) and outcome. The propensity score of each infant was defined as the probability of having an  
131 amino acid intake greater than 3.50 g/kg/d based on the infant's individual observed covariates. The score  
132 was estimated using a logistic regression model, with amino acid intake greater than 3.50 g/kg/d at day 7 as the  
133 dependent variable with regard to baseline maternal, infant, and NICU characteristics. Birth weight z-scores  
134 were based on Olsen curves. The proportion of participants with missing data ranged from 0% to 8.5%,  
135 exceeding 4.0% only for data on Apgar score at 5 minutes and maternal educational level. Missing data were  
136 treated as a separate category. The primary analysis was based on propensity score matching. We used a 1:1  
137 matching algorithm without replacement to match exposed and nonexposed newborns based on propensity score  
138 within a caliper of 0.2 SD of the logit of the propensity score.<sup>17</sup> Imbalance after matching was checked (Table 1).  
139 First, we compared rate of systolic and diastolic HBP between exposed and non-exposed preterm infant  
140 groups, between exposed preterm infant group and control born term group and between non-exposed  
141 preterm infant group and control term-born group. Second, we calculated Odds ratios (ORs) to quantify the  
142 association between high amino acid intake at day 7, maximum serum creatinine between day 3 and day 7  
143 and primary outcomes (systolic and diastolic HBP) using logistic regression analysis fit by generalized  
144 estimating equations to account for paired data.<sup>18</sup>  
145  
146 Sensitivity analyses were performed among the overall cohort, after adjustment for gestational age, sex, birth  
147 weight z score, and adjusting for risk factor for HBP, using the inverse probability treatment weighting  
148 method,<sup>19</sup> and among the matched cohort but restricted to blood pressure measurements performed with  
149 an automatic blood pressure monitor.  
150  
151  
152 Complementary analyses were performed using systolic and diastolic BPs as continuous variables. First, we  
153 measured the Spearman correlation between systolic and diastolic BPs and macronutrient intake as a continuous  
154 variable in the matched cohort. In the overall cohort, we used general linear equations and adjustment for  
155 gestational age, sex, and birth weight z score, weighted by the inverse of the propensity score. A pathway

156 analysis was performed to find out whether the relationship between high early amino-acid intake and later BP is  
157 mediated by the 5-year weight Z-score.

158

159

160 All tests were 2-sided, and  $p < .05$  were considered statistically significant. All analyses were performed using  
161 SPSS®, version 26. Data were analyzed from January 15th to May 15th, 2023.

162

## 163 RESULTS

### 164 *Study population*

165 Among the 2136 preterm infants born between 24+0 and 29+6 gestation admitted to NICUs  
166 during the study period, 170 died within the first 7 days, leaving 1966 alive at day 7. Among these,  
167 information about amino-acid intake at day 7 after birth was available in 1789 infants. Among the  
168 1789 infants, 938 received more than 3.5g/kg/day (exposed group) and 851 did not (non-exposed  
169 group) (Figure 1). These infants were hospitalized in 63 NICUs, where the percentage of exposure  
170 varied from 0–100% (eFigure 1 in the Supplement). Differences between the exposed and non-exposed  
171 infants are presented in Table 1.

### 172 *Propensity matched analysis*

173 Propensity scores were calculated in 1789 very preterm infants. Distributions of propensity  
174 scores are summarized in eFigure 2 in the Supplement. Propensity scores ranged from 0.095 to 0.922.  
175 The area under the receiver operating characteristic curve for the propensity score model was 0.67  
176 (95% confidence interval [CI], 0.64 to 0.69), eFigure 2. Among the 1789 preterm infants, 1434 could  
177 be matched, with 717 in each group, exposed and non-exposed. The matched groups were found to be  
178 well-balanced for all recorded baseline variables (Table 1). Maximal creatinine observed in plasma  
179 between day 3 and day 7 after birth, was significantly lower in exposed group (Table 2).  
180 Characteristics of nutrition intake at day 3, 7 and 28 after birth and outcome at 36 weeks of  
181 postmenstrual age are indicated in Table 2. At 36 weeks of postconceptional age and at discharge,  
182 nutrition intake were similar.

183

184 In the matched cohort, at five years, rates of children alive were similar in the 2 groups. The  
185 number of measurements of blood pressure was 3 for 354 and 358, 2 for 21 and 19, and only 1 for 10  
186 and 12 children in the non-exposed and exposed groups, respectively. The mode of measurement was  
187 automatic oscillometric method in 291/385 (75.6%) and 308/389 (79.2%) of Non-exposed and  
188 Exposed groups, respectively,  $p=0.023$ . The mean systolic blood pressure was higher in the Exposed  
189 group: 100.2 (10.6) versus 98.6 (10.4) mmHg,  $p=0.036$ ; but not the mean diastolic blood pressure:  
190 59.1 (8.9) versus 58.7 (8.6) mmHg,  $p=0.615$  (Table 3). Systolic HBP tended to be more frequent in  
191 Exposed group, 18.0% (70/388) versus 13.3% (51/384),  $p=0.069$  but not diastolic HBP rate, 9.0%  
192 (35/388) versus 10.2% (39/384),  $p=0.592$ . In control group born at term, rates of systolic and  
193 diastolic HBP were 8.5% (49/574) and 5.4% (31/574), respectively. Thus, compared with control  
194 group, the rate systolic HBP was greater in the 2 preterm groups, whether exposed (18.0% versus  
195 8.5%,  $p<0.001$ ) or not exposed (13.3% versus 8.5%,  $p=0.019$ ). Similarly, diastolic HBP rate was more  
196 common (9.0% and 10.2% in exposed and non-exposed preterm groups, respectively), compared with  
197 5.4% ( $p=0.03$  and  $P=0.006$ ) in controls.

198 Among preterm infants, exposure to a high amino acid intake at day 7 after birth, and maximal creatinine  
199 observed in plasma between day 3 and day 7 after birth, were significantly associated with systolic  
200 HBP (adjusted Odds Ratio [aOR], 1.60 ; 95% CI, 1.05 to 2.43 and aOR=1.59; 95%CI 1.12 to 2.26,  
201 respectively), but not with diastolic HBP, (aOR =0.84 ; 95% CI, 0.50 to 1.39 and aOR=1.09; 95%CI  
202 0.71 to 1.67, respectively) (Figure 2, part A).

203

204 In addition, we observed a nearly significant or a significant linear relationship between amino acid  
205 intake at day 7 after birth or maximal creatinine observed in plasma between day 3 and day 7, and  
206 systolic BP as continuous variable: adjusted beta =1.00 mmHg per 1 gr /kg of amino acid intake;  
207 95%CI -0.19 to 2.71 and adjusted beta =2.01 mmHg per 50  $\mu$ mol of creatinine; 95%CI 0.42 to 3.60  
208 respectively (Figure 2, part B). But, we did not observe any significant correlation between amino

209 acid intake at day 7 or maximal creatinine observed in plasma between day 3 and day 7, and diastolic  
210 blood pressure. The pathway analysis showed that the relationship between high early amino-acid  
211 intake and later systolic BP was not mediated by the 5-year weight Z-score (eFigure 3).

212

213

#### 214 ***Sensitivity analyses***

215 These associations were consistent across sensitivity analyses performed in the overall cohort or in the  
216 matched cohort but restricted to blood pressure measurements performed with an automatic blood  
217 pressure monitor.

- 218 • ***Inverse probability of treatment weighting analysis in the overall cohort***

219 Exposure to a high amino acid intake at day 7 after birth and the maximal plasma creatinine observed between  
220 day 3 and day 7 after birth, were significantly associated with systolic HBP (aOR= 1.51 ; 95% CI, 1.02 to 2.24  
221 and aOR=1.52; 95%CI 1.08 to 2.13, respectively), but not with diastolic HBP, (aOR =0.89 ; 95% CI, 0.57  
222 to 1.39 and aOR=1.02; 95%CI 0.68 to 1.53, respectively) after adjustment for gestational age, sex,  
223 birth weight Z-score and weighted by the inverse of the propensity score (eFigure 4, Part A).

- 224 • ***Matched cohort restricted to automatic blood pressure measurements***

225 The mean systolic blood pressure was higher in the Exposed group : 101.4 (10.2) versus 99.3 (10.2)  
226 mmHg, p=0.013; but not the mean diastolic blood pressure: 59.1 (8.6) versus 59.0 (8.1) mmHg,  
227 p=0.801. Systolic HBP was more frequent in Exposed group, 20.5% (63/307) versus 13.3% (39/  
228 290 ), p=0.022 but not diastolic HBP rate, 9.0% (/388) versus 10.2% (39/384), p=0.592. Exposure to a  
229 high amino acid intake at day 7 after birth and the maximal creatinine observed in plasma between day  
230 3 and day 7 after birth, were significantly associated with systolic HBP (aOR= 1.96 ; 95% CI, 1.21 to  
231 3.18 and aOR=1.78; 95%CI 1.19 to 2.66 respectively, eFigure 5, Part A), but not with diastolic HBP,  
232 (aOR =1.00 ; 95% CI, 0.54 to 1.85 and aOR=0.87; 95%CI 0.51 to 1.48 ). Moreover, the linear  
233 relationships between amino acid intake at day 7 after birth or maximal plasma creatinine between day  
234 3 and day 7, and systolic BP (adjusted beta =1.61 mmHg per 1 gr /kg of amino acid intake; 95%CI



235 0.28 to 2.93 and adjusted beta 1.94 mmHg per 50  $\mu$ mol of creatinine; 95%CI 0.31 to 3.57  
236 respectively) were significant (eFigure 5, Part B). In contrast, we did not observe any significant  
237 relationship between amino acid intake at day 7 or maximal plasma creatinine between day 3 and day  
238 7, and diastolic blood pressure. The pathway analysis showed that the relationship between high early  
239 amino-acid intake and later systolic BP was not mediated by the 5-year weight Zscore (e Figure 6).

240

## 241 DISCUSSION

242 The findings of the current study confirm the increased risk of HBP at 5 years in a population  
243 of children born very preterm. They further reveal that the risk of systolic HBP is significantly higher  
244 in preterm infants that were exposed to higher early amino-acid intake in the first week of postnatal  
245 life. Finally, they suggest that two different mechanisms may be involved for systolic HBP and  
246 diastolic HBP, the former likely implicating the kidney since a higher “maximum plasma creatinine  
247 between day3 and day7 after birth” was a risk factor for systolic HBP, but not for diastolic HBP.

248

249 Systematic reviews and meta-analyses have reported significantly higher BP in very preterm  
250 infants, with a difference, depending on studies, ranging from 2 to 7 mmHg for systolic pressure and 2  
251 to 3 mmHg for diastolic pressure, compared with control subjects born at full term.<sup>1, 5, 20-27</sup> We here  
252 confirm the risk of higher BP at 5 years for diastolic pressure in our population of very preterm infants,  
253 regardless of amino acid intake in the first week of life. Yet the risk for systolic BP was only increased  
254 in the exposed infants. As the heights of children born very preterm are smaller once they reach late  
255 childhood, the rate of systolic HBP according to age and height is also significantly higher in non-  
256 exposed groups of children born very preterm than those born at term. Such observation is of  
257 importance as preterm-born adults have been found to have a unique left ventricular structure and  
258 function that worsens with systolic blood pressure elevation.<sup>28</sup> Thus, additional primary preventive  
259 strategies specifically targeting cardiovascular risk reduction in this population may be warranted. To

260 achieve that goal, it seems relevant to briefly discuss our understanding of the underlying

261 pathophysiology of high systemic blood pressure.

262

263 In the current study, early exposure to higher amino-acid intake was associated with higher  
264 systolic blood pressure and increased risk of systolic HBP as a function of age and height. The  
265 association can be attributed to amino-acid intake *per se*, since baseline infant characteristics are very  
266 similar between exposed and unexposed groups in the matched cohort. Only nutritional intake at day 3  
267 and day 7 was very different between the 2 groups, and the difference, albeit smaller, remained  
268 significant at Day 28. Though the intake of all macronutrients was higher in the exposed group, yet  
269 among the 3 macronutrients measured (amino-acid, carbohydrate and lipid), only early amino-acid  
270 intake was significantly correlated to systolic blood pressure. This is consistent with the results of the  
271 study reported by Wang et al,<sup>29</sup> where a relationship between random plasma insulin levels at birth and  
272 later HBP in early childhood was observed. Though serum insulin was not measured in our study,  
273 serum insulin level likely was higher in the exposed group, since a higher intake of amino acid,  
274 particularly of branched-chain amino acids, is known to enhance insulin secretion.<sup>30</sup> In our study,  
275 higher amino-acid intake was associated only with systolic HBP, but not with diastolic HBP. Other  
276 studies that have examined the relationship between neonatal nutritional intakes and the later risk of  
277 HBP have observed either an association with diastolic HBP<sup>31</sup> or no association,<sup>30-32</sup> but none focused  
278 on early amino-acid intake in the first week of life.

279

280 Serum creatinine observed between Day3 and Day 7 was significantly lower in the Exposed  
281 group. At least 3 hypotheses can be raised to account for this observation. First, in theory, this could be  
282 due to an indication bias to receive higher amino-acid intake (i.e., clinicians might have been less  
283 prone to prescribe high amino acid intake in infants with a higher serum creatinemia): but this seems  
284 unlikely, given the high degree of similarity between the two matched groups (Exposed and Non-  
285 exposed). Second, a decreased rate muscle protein breakdown, resulting in a decrease in creatinine

286 release from skeletal muscle, could have occurred in the Exposed group, since a higher amino acid  
287 intake is known to inhibit proteolysis in infants<sup>33,34</sup> Third, increased glomerular filtration rate (also  
288 known as hyperfiltration) could occur in the kidneys in response to exposure to a high early amino-  
289 acid intake in the Exposed group. This latter hypothesis is consistent with animal models.<sup>35</sup> As such,  
290 glomerulosclerosis would be the result of glomerular hyperfiltration on immature kidneys, which in  
291 turn could lead to secondary increased blood pressure (BP) via activation of the renin–angiotensin  
292 system as observed in rats. Moreover, as a higher maximum creatinine between day3 and day7 after  
293 birth was a risk factor for systolic HBP in our cohort, the role of kidneys is very likely, as suggested by  
294 this study performed in general population where early high protein intake was associated with later  
295 systolic hypertension and an increase in kidney volume at 11 years of age.<sup>36</sup> The mechanism  
296 underlying this relationship could be the role of senescence pathways as observed in rats.<sup>37</sup>  
297

298 Our study had several strengths and limitations. Its first strength stems from the fact that a five-years  
299 follow- up in the national population based EPIPAGE2 cohort allowed us to investigate the association  
300 between initial nutritional intake, which had been very precisely collected in a prospective fashion,  
301 and later BP at the age of 5 years. Second, prospective follow-up with 3 repeated BP measurements  
302 reduced potential bias due to inherent BP variability and measurement error. Finally, we used a  
303 propensity score approach to control as much as possible for confounding factors. Our study also had a few  
304 limitations. First, BP measurements were performed on only 60% of the children born very preterm  
305 alive at 5 years but the attrition was similar in Exposed and Non-exposed groups. Second, no blood  
306 sampling was performed and thus we have no information concerning kidney function at 5 years of  
307 age. Finally, this study remains an observational study, and, as such can only highlight associations,  
308 rather than elucidate causal relationships.

309

310 In conclusion, we confirmed the risk of HBP in mid childhood in children born very preterm and  
311 observed an association between early higher amino-acid intake and systolic HBP, whereas we had  
312 earlier reported improved cognitive outcomes at age 5 years in the same exposed group in the same  
313 matched cohort.<sup>7</sup> Thus, we are still facing a persistent nutritional dilemma regarding the management  
314 of very preterm infants: how can we promote neurocognitive development and still preserve long  
315 term cardiovascular health?<sup>38</sup>

316

317

318

319

## 320 References

- 321 1. De Jong F, Monuteaux MC, van Elburg RM, Gillman MW, Belfort MB. Systematic review and meta-analysis of  
322 preterm birth and later systolic blood pressure. *Hypertension*. 2012; 59:226-34. [PubMed: 22158643]
- 323 2. Flahault A, Girard-Bock C, Fernandes RO, Cloutier A, Pastore YD, Luu TM, Nuyt AM. Duration of neonatal  
324 oxygen supplementation, erythropoiesis and blood pressure in young adults born preterm. *Thorax*. 2020; 7:494-  
325 502. [PubMed: 3221779]
- 326 3. Paquette K, Fernandes RO, Xie LF, Cloutier A, Fallaha C, Girard-Bock C, Mian MOR, Lukaszewski MA, Mâsse  
327 B, El-Jalbout R, Lapeyraque AL, Santos RA, Luu TM, Nuyt AM. Kidney Size, Renal Function, Ang  
328 (Angiotensin) Peptides, and Blood Pressure in Young Adults Born Preterm. *Hypertension*. 2018; 72:918-28.  
329 [PubMed: 30354721]
- 330 4. Parada-Ricart E, Ferre N, Luque V, Gruszfeld D, Gradowska K, Closa-Monasterolo R, Koletzko B, Grote V,  
331 Escribano Subías J. Effect of Protein Intake Early in Life on Kidney Volume and Blood Pressure at 11 Years of  
332 Age. Effect of Protein Intake Early in Life on Kidney Volume and Blood Pressure at 11 Years of Age. *Nutrients*.  
333 2023; 15:874. [PubMed: 36839233]
- 334 5. Zamir I, Stoltz Sjöström E, Edstedt Bonamy AK, Mohlkert LA, Norman M, Domeloff M. Postnatal nutritional  
335 intakes and hyperglycemia as determinants of blood pressure at 6.5 years of age in children born extremely  
336 preterm. *Pediatr Res*. 2019; 86:115-21. [PubMed: 3077693]
- 337 6. Bacchetta J, Harambat J, Dubourg L, Guy B, Liutkus A, Canterino I, Kassai B, Putet G, Cochat P. Both  
338 extrauterine and intrauterine growth restriction impair renal function in children born very preterm. *Kidney Int*.  
339 2009; 76:445-52. [PubMed: 19516242]
- 340 7. Rozé JC, Morel B, Lapillonne A, Marret S, Guellec I, Darmaun D, Bednarek N, Moyon T, Marchand-Martin L,  
341 Benhammou V, Pierrat V, Flamant C, Gascoin G, Mitanchez D, Cambonie G, Storme L, Tosello B, Biran V,  
342 Claris O, Picaud JC, Favrais G, Beuchée A, Loron G, Gire C, Durrmeyer X, Gressens P, Saliba E, Ancel PY.  
343 Association Between Early Amino Acid Intake and Full-Scale IQ at Age 5 Years Among Infants Born at Less  
344 Than 30 Weeks' Gestation. *JAMA Netw Open*. 2021; 4:e2135452. [PubMed: 34846527]
- 345 8. Pierrat V, Marchand-Martin L, Marret S, Arnaud C, Benhammou V, Cambonie G, Debillon T, Dufourg MN, Gire  
346 C, Goffinet F, Kaminski M, Lapillonne A, Morgan AS, Rozé JC, Twilhaar S, Charles MA, Ancel PY.  
347 Neurodevelopmental outcomes at age 5 among children born preterm: EPIPAGE-2 cohort study. *BMJ*. 2021;  
348 373:n741. [PubMed: 33910920]
- 349 9. Charles MA, Thierry X, Lanoe JL, Bois C, Dufourg MN, Popa R, Cheminat M, Zaros C, Geay B. Cohort Profile:  
350 The French national cohort of children (ELFE): birth to 5 years. *Int J Epidemiol*. 2020; 49:368-9j. [PubMed:  
351 31747017]
- 352 10. Hay WW Jr, Lucas A, Heird WC, Ziegler E, Levin E, Grave GD, Catz CS, Yaffe SJ. Workshop summary:  
353 nutrition of the extremely low birth weight infant. *Pediatrics*. 1999; 104:1360-8. [PubMed: 10585989]
- 354 11. Denne SC. Protein and energy requirements in preterm infants. *Semin Neonatol*. 2001; 6:377-82. [PubMed:  
355 11988027]
- 356 12. Koletzko B, Goulet O, Hunt J, Krohn K, Shamir R; Parenteral Nutrition Guidelines Working Group; European  
357 Society for Clinical Nutrition and Metabolism; European Society of Paediatric Gastroenterology, Hepatology and  
358 Nutrition (ESPGHAN); European Society of Paediatric Research (ESPR). 1. Guidelines on Paediatric Parenteral  
359 Nutrition of the European Society of Paediatric Gastroenterology, Hepatology and Nutrition (ESPGHAN) and the  
360 European Society for Clinical Nutrition and Metabolism (ESPEN), Supported by the European Society of  
361 Paediatric Research (ESPR). *J Pediatr Gastroenterol Nutr*. 2005;41:S1-87. [PubMed: 16254497]
- 362 13. Flynn JT, Kaelber DC, Baker-Smith CM, Blowey D, Carroll AE, Daniels SR, de Ferranti SD, Dionne JM, Falkner  
363 B, Flinn SK, Gidding SS, Goodwin C, Leu MG, Powers ME, Rea C, Samuels J, Simasek M, Thaker VV, Urbina  
364 EM; Subcommittee on screening and management of high blood pressure in children. Clinical Practice Guideline  
365 for Screening and Management of High Blood Pressure in Children and Adolescents. *Pediatrics*. 2017;  
366 140:e20171904. [PubMed: 28827377]
- 367 14. National High Blood Pressure Education Program Working Group on High Blood Pressure in Children and  
368 Adolescents. The fourth report on the diagnosis, evaluation, and treatment of high blood pressure in children and  
369 adolescents. *Pediatrics*. 2004; 114:555-76. [PubMed: 15286277]
- 370 15. Podoll A, Grenier M, Croix B et Feig DI. Inaccuracy in Pediatric Outpatient Blood Pressure Measurement.  
371 *Pediatrics* 2007; 119, e538-43. [PubMed: 17332173]
- 372 16. Rosenbaum PR, Rubin DB. The central role of the propensity score in observational studies for causal effects.  
373 *Biometrika*. 1983; 70:41-55.

- 374 17. Austin PC. A comparison of 12 algorithms for matching on the propensity score. *Stat Med.* 2014; 33:1057-69.  
375 [PubMed: 24123228]
- 376 18. Liang KY, Zeger SL. Longitudinal data analysis using generalized linear models. *Biometrika.* 1986; 73:13-22
- 377 19. Lunceford JK, Davidian M. Stratification and weighting via the propensity score in estimation of causal treatment  
378 effects: a comparative study. *Stat Med.* 2004; 23:2937-60. [PubMed: 15351954]
- 379 20. Irving RJ, Belton NR, Elton RA, Walker BR. Adult cardiovascular risk factors in premature babies. *Lancet.* 2000;  
380 355:2135-6. [PubMed: 10902631]
- 381 21. Parkinson JR, Hyde MJ, Gale C, Santhakumaran S, Modi N. Preterm birth and the metabolic syndrome in adult  
382 life: a systematic review and meta-analysis. *Pediatrics.* 2013; 131:e1240-63 [PubMed: 23509172]
- 383 22. Johansson S, Iliadou A, Bergvall N, Tuvemo T, Norman M, Cnattingius S. Risk of high blood pressure among  
384 young men increases with the degree of immaturity at birth. *Circulation.* 2005; 112:3430-3436. [PubMed:  
385 16301344]
- 386 23. Juonala M, Cheung MM, Sabin MA, Burgner D, Skilton MR, Kähönen M, Hutri-Kähönen N, Lehtimäki T, Jula  
387 A, Laitinen T, Jokinen E, Taittonen L, Tossavainen P, Viikari JS, Magnussen CG, Raitakari OT. Effect of birth  
388 weight on life-course blood pressure levels among children born premature: the Cardiovascular Risk in Young  
389 Finns Study. *J Hypertens.* 2015; 33:1542-8. [PubMed: 26136063]
- 390 24. Sipola-Leppänen M, Karvonen R, Tikanmäki M, Matinlinna HM, Martikainen S, Pesonen AK, Räikkönen K,  
391 Järvelin MR, Hovi P, Eriksson JG, Väärasmäki M, Kajantie E. Ambulatory blood pressure and its variability in  
392 adults born preterm. *Hypertension.* 2015; 65:615-21. [PubMed: 25601930]
- 393 25. Hovi P, Vohr B, Ment LR, Doyle LW, McGarvey L, Morrison KM, Evensen KA, van der Pal S, Grunau RE;  
394 APIC Adults Born Preterm International Collaboration; Brubakk AM, Andersson S, Saigal S, Kajantie E. Blood  
395 Pressure in Young Adults Born at Very Low Birth Weight: Adults Born Preterm International Collaboration.  
396 *Hypertension.* 2016; 68:880-7. [PubMed: 27572149]
- 397 26. Markopoulou P, Papanikolaou E, Analytis A, Zoumakis E, Siahaidou T. Preterm Birth as a Risk Factor for  
398 Metabolic Syndrome and Cardiovascular Disease in Adult Life: A Systematic Review and Meta-Analysis. *J*  
399 *Pediatr.* 2019 ; 210:69-80.e5. [PubMed: 30992219]
- 400 27. Haikerwal A, Doyle LW, Cheung MM, Wark JD, Opie G, Roberts G, Patton G, Cheong JLY. High Blood  
401 Pressure in Young Adult Survivors Born Extremely Preterm or Extremely Low Birthweight in the Post Surfactant  
402 Era. *Hypertension.* 2020; 75:211-7. [PubMed: 31735082]
- 403 28. Mohamed A, Marciniak M, Williamson W, Huckstep OJ, Lapidaire W, McCance A, Neubauer S, Leeson P,  
404 Lewandowski AJ. Association of Systolic Blood Pressure Elevation With Disproportionate Left Ventricular  
405 Remodeling in Very Preterm-Born Young Adults: The Preterm Heart and Elevated Blood Pressure. *JAMA*  
406 *Cardiol.* 2021; 6:821-9. [PubMed: 33978675]
- 407 29. Wang G, Buckley JP, Bartell TR, Hong X, Pearson C, Wang X. Cord Blood Insulin Concentration and  
408 Hypertension Among Children and Adolescents Enrolled in a US Racially Diverse Birth Cohort. *Hypertension.*  
409 2023; 80:1092-101. [PubMed: 36912156]
- 410 30. Koletzko B, Kirchberg FF, Hellmuth C, Weber M, Grote V, Demmelmair H, Standl M, Heinrich J, Thiering E,  
411 Uhl O. Metabolic Regulation of Pre- and Postnatal Growth. *Nestle Nutr Inst Workshop Ser.* 2018; 89:79-91.  
412 [PubMed: 29991034]
- 413 31. Singhal A, Cole TJ, Fewtrell M, Kennedy K, Stephenson T, Elias-Jones A, Lucas A. Promotion of faster weight  
414 gain in infants born small for gestational age: is there an adverse effect on later blood pressure? *Circulation.* 2007;  
415 115:213-20. [PubMed: 17179023]
- 416 32. Lin L, Gamble GD, Crowther CA, Bloomfield FH, Agosti M, Atkinson SA, Biasini A, Embleton ND, Fewtrell  
417 MS, Lamy-Filho F, Fusch C, Gianni ML, Kanmaz Kutman HG, Koo W, Litmanovitz I, Morgan C,  
418 Mukhopadhyay K, Neri E, Picaud JC, Rochow N, Roggero P, Singhal A, Stroemmen K, Tan MJ, Tandoi FM,  
419 Wood CL, Zachariassen G, Harding JE. Sex-Specific Effects of Nutritional Supplements for Infants Born Early or  
420 Small: An Individual Participant Data Meta-Analysis (ESSENCE IPD-MA) I-Cognitive Function and Metabolic  
421 Risk. *Nutrients.* 2022; 14:418. [PubMed: 35276786]
- 422 33. Wyss M, Kaddurah-Daouk R. Creatine and creatinine metabolism. *Physiol Rev.* 2000; 80:1107-213. [PubMed:  
423 10893433]
- 424 34. Kalhan SC, Iben S. Protein metabolism in the extremely preterm infant. *Clin Perinatology.* 2000; 27: 23-56.  
425 [PubMed: 10690563]
- 426 35. Boubred F, Buffat C, Feuerstein JM, Daniel L, Tsimaratos M, Oliver C, Lelièvre-Pégorier M, Simeoni U. Effects  
427 of early postnatal hypernutrition on nephron number and long-term renal function and structure in rats. *Am J*  
428 *Physiol Renal Physiol.* 2007; 293:F1944-9. [PubMed: 17898037]
- 429 36. Parada-Ricart E, Ferre N, Luque V, Gruszfeld D, Gradowska K, Closa-Monasterolo R, Koletzko B, Grote V,  
430 Escribano Subías J. Effect of Protein Intake Early in Life on Kidney Volume and Blood Pressure at 11 Years of  
431 Age. *Nutrients.* 2023 Feb 9;15(4):874. [PubMed: 36839233]

- 432  
433  
434  
435  
436  
437  
438  
  
439  
  
440
37. Juvet C., Siddeek B., Yzydorczyk C., Vergely C., Nardou K., Armengaud J.-B., Benahmed M., Simeoni U., Cachat F., Chehade H. Renal Programming by Transient Postnatal Overfeeding: The Role of Senescence Pathways. *Front Physiol.* 2020; 11:511. [PubMed: 32523548]
  38. Brown LD, Hay WW Jr. The nutritional dilemma for preterm infants: how to promote neurocognitive development and linear growth, but reduce the risk of obesity. *J Pediatr.* 201; 163:1543-5. [PubMed: 24018016]





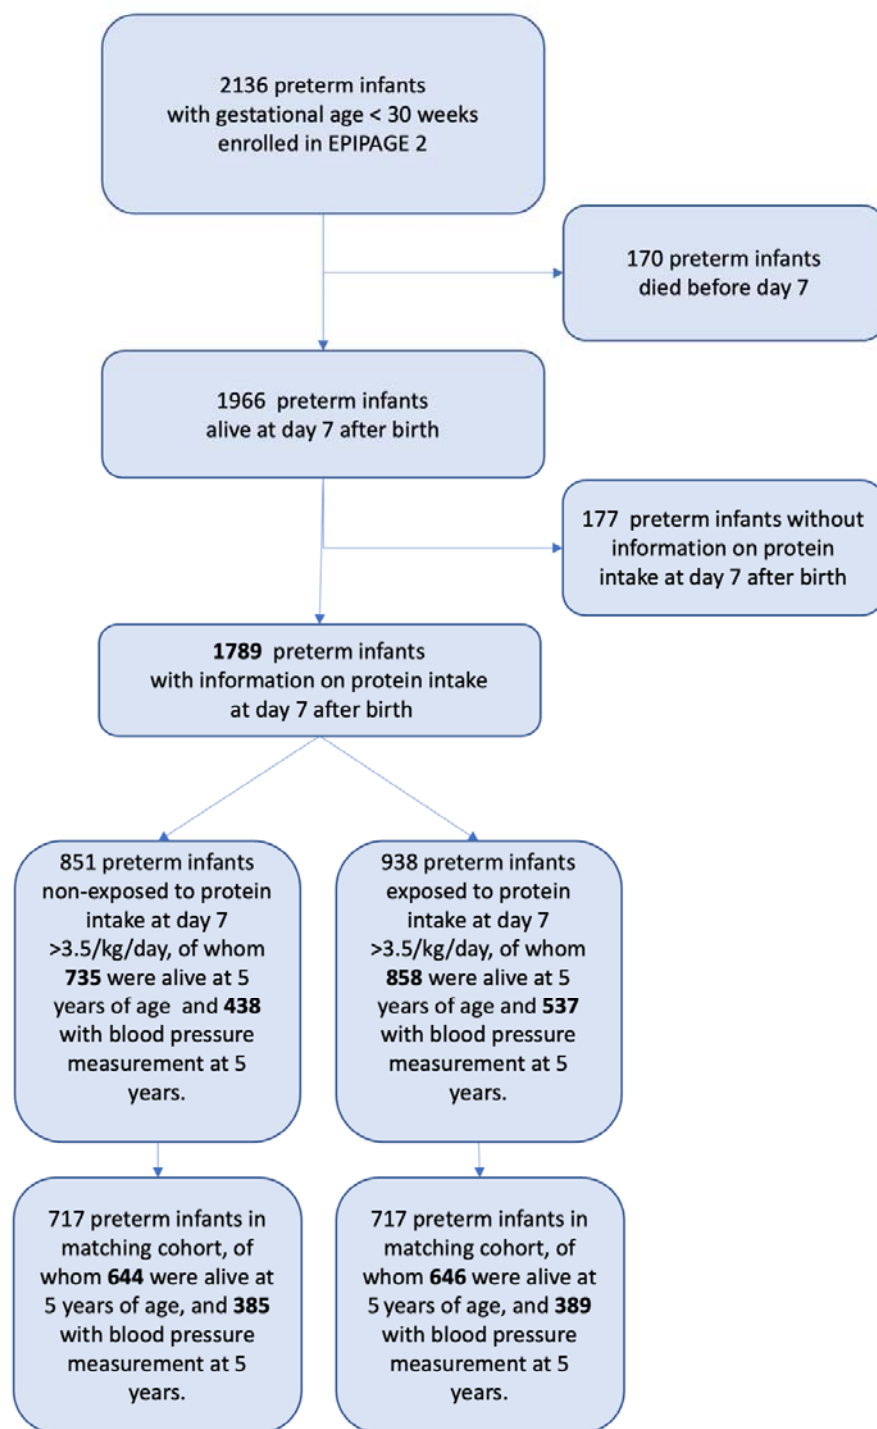

442  
443  
444

**Figure 1.** Flow chart

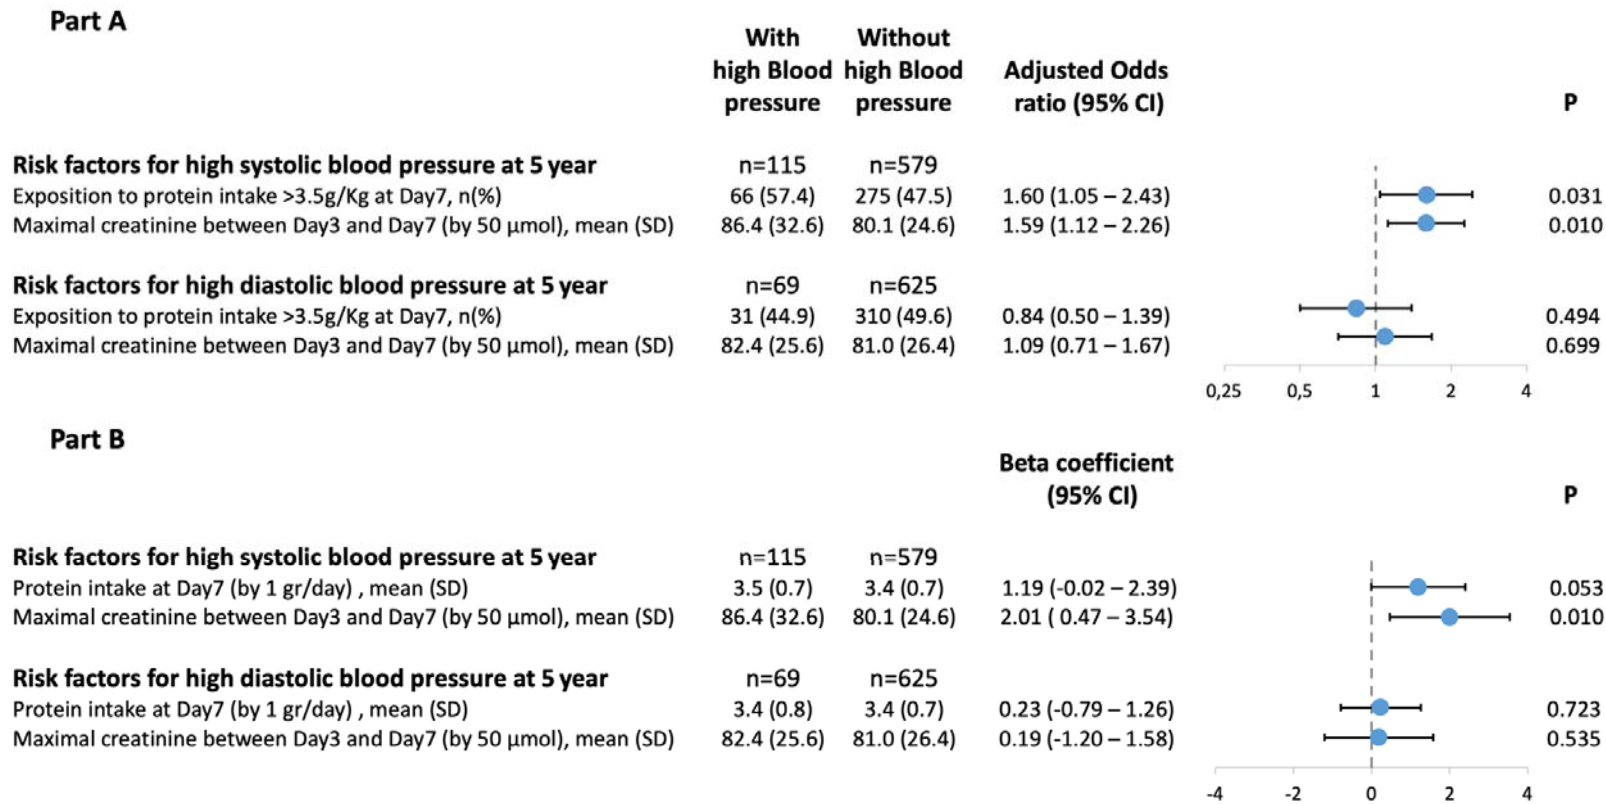

**Figure 2.** Relationship between blood pressure at five years and 2 risk factors: amino-acids intake at day 7 after birth and maximal creatinine observed between Day3 and Day 7 after birth, in matched cohort.

Part A: Multivariable analysis of surviving with high blood pressure.

Part B: Beta coefficient between blood pressure and the 2 risk factors

**Table 1.** Baseline characteristics

| Characteristics                                | No./Total ( ) or Mean (SD)    |                           |                            |                              |                           |                            |
|------------------------------------------------|-------------------------------|---------------------------|----------------------------|------------------------------|---------------------------|----------------------------|
|                                                | Overall Cohort (N = 1789)     |                           |                            | Matched Cohort (N = 1434)    |                           |                            |
|                                                | Nonexposed<br>N =851<br>n (%) | Exposed<br>N=938<br>n (%) | Standardized<br>difference | Nonexposed<br>N=717<br>n (%) | Exposed<br>N=717<br>n (%) | Standardized<br>difference |
| <b>Maternal level of education</b>             |                               |                           |                            |                              |                           |                            |
| Information missing                            | 137 (16.10)                   | 103 (10.98)               | 15.01                      | 95 (13.25)                   | 95 (13.25)                | 0                          |
| less than high school diploma                  | 241 (28.32)                   | 231 (24.63)               | 8.37                       | 194 (27.06)                  | 193 (26.92)               | 0.32                       |
| High school diploma                            | 157 (18.45)                   | 175 (18.66)               | 0.54                       | 137 (19.11)                  | 134 (18.69)               | 1.07                       |
| Higher than high school diploma                | 316 (37.13)                   | 429 (45.74)               | 17.55                      | 291 (40.59)                  | 295 (41.14)               | 1.12                       |
| <b>Gestational age in weeks. mean (SD)</b>     | 27.16 (1.55)                  | 27.18 (1.46)              | 1.33                       | 27.21 (1.55)                 | 27.17 (1.47)              | 2.65                       |
| <b>Birthweight z-score. mean (SD)*</b>         | -0.10 (0.99)                  | -0.09 (1.01)              | 1.00                       | -0.07 (±0.97)                | -0.07 (±1.01)             | 0.00                       |
| <b>Sex</b>                                     |                               |                           |                            |                              |                           |                            |
| Male                                           | 469 (55.11)                   | 460 (49.04)               | 12.11                      | 386 (53.84)                  | 376 (52.44)               | 2.81                       |
| Female                                         | 382 (44.89)                   | 478 (50.96)               |                            | 331 (46.16)                  | 341 (47.56)               |                            |
| <b>Leading causes of preterm delivery</b>      |                               |                           |                            |                              |                           |                            |
| Information missing                            | 20 (2.4)                      | 36 (3.8)                  | 8.61                       | 17 (2.37)                    | 19 (2.65)                 | 1.79                       |
| Twins or triplets                              | 288 (33.84)                   | 287 (30.60)               | 6.94                       | 242 (33.75)                  | 225 (31.38)               | 5.06                       |
| Singleton with preterm labor                   | 239 (28.08)                   | 251 (26.76)               | 2.96                       | 195 (27.2)                   | 207 (28.87)               | 3.72                       |
| Singleton with preterm rupture of membranes    | 127 (14.92)                   | 164 (17.48)               | 6.95                       | 113 (15.76)                  | 114 (15.90)               | 0.38                       |
| Singleton with vascular disorders and FGR      | 66 (7.76)                     | 71 (7.57)                 | 0.71                       | 55 (7.67)                    | 56 (7.81)                 | 0.52                       |
| Singleton with vascular disorders. without FGR | 76 (8.93)                     | 82 (8.74)                 | 0.67                       | 63 (9.00)                    | 63 (9.03)                 | 0.00                       |
| Singleton with placental abruption             | 11 (1.29)                     | 13 (1.32)                 | 0.87                       | 10 (1.43)                    | 10 (1.43)                 | 0.00                       |

|                                                                     |             |             |       |  |             |             |      |
|---------------------------------------------------------------------|-------------|-------------|-------|--|-------------|-------------|------|
| Singleton with isolated fetal growth retardation                    | 24 (2.82)   | 34 (3.62)   | 4.53  |  | 22 (3.14)   | 23 (3.30)   | 0.80 |
| <b>Antenatal corticosteroids</b>                                    |             |             |       |  |             |             |      |
| Information missing                                                 | 30 (3.53)   | 33 (3.52)   | 0.05  |  | 30 (4.18)   | 29 (4.04)   | 0.71 |
| No                                                                  | 143 (16.80) | 160 (17.06) | 0.69  |  | 114 (15.90) | 122 (17.02) | 3.02 |
| Incomplete cure                                                     | 163 (19.15) | 130 (13.86) | 14.27 |  | 116 (16.18) | 115 (16.04) | 0.38 |
| Yes                                                                 | 515 (60.52) | 615 (65.57) | 10.48 |  | 457 (63.73) | 451 (62.90) | 1.72 |
| <b>Caesarean section</b>                                            |             |             |       |  |             |             |      |
| Information missing                                                 | 13 (1.53)   | 8 (0.85)    | 6.27  |  | 5 (0.70)    | 6 (0.84)    | 1.60 |
| Yes                                                                 | 530 (62.28) | 563 (60.02) | 4.64  |  | 450 (62.76) | 435 (60.67) | 4.30 |
| <b>APGAR <math>\geq 7</math> at 5 minutes after birth</b>           |             |             |       |  |             |             |      |
| Information missing                                                 | 77(9.05)    | 54 (5.76)   | 12.59 |  | 52 (7.25)   | 50 (6.97)   | 1.09 |
| Yes                                                                 | 586 (68.86) | 684 (72.92) | 8.95  |  | 505 (70.43) | 507 (70.71) | 0.61 |
| <b>Regular intestinal transit during the first week after birth</b> |             |             |       |  |             |             |      |
| Information missing                                                 | 34(4.00)    | 43(4.58)    | 2.86  |  | 31(4.32)    | 31(4.32)    | 0    |
| Yes                                                                 | 430 (50.53) | 499 (53.20) | 5.35  |  | 359 (50.07) | 379 (52.86) | 5.58 |
| <b>Acute kidney failure</b>                                         |             |             |       |  |             |             |      |
| Information missing                                                 | 23 (2.70)   | 31 (3.30)   | 3.52  |  | 20 (3.18)   | 19 (2.75)   | 2.54 |
| Yes                                                                 | 107 (12.57) | 59 (6.29)   | 17.31 |  | 59 (8.23)   | 56 (7.81)   | 1.55 |
| <b>Surfactant</b>                                                   |             |             |       |  |             |             |      |
| • Information missing                                               | 4 (0.47)    | 2 (0.21)    | 4.47  |  | 2 (0.28)    | 2 (0.28)    | 0    |
| • No                                                                | 143 (16.80) | 149 (15.88) | 2.49  |  | 127 (17.71) | 117 (16.32) | 3.70 |
| • 1 dose                                                            | 493 (57.93) | 578 (61.62) | 7.53  |  | 421 (58.72) | 430 (59.97) | 2.55 |

|                                                                          |             |             |       |  |             |             |      |
|--------------------------------------------------------------------------|-------------|-------------|-------|--|-------------|-------------|------|
| • >2 doses                                                               | 211 (24.79) | 209 (22.28) | 5.9   |  | 167 (23.29) | 168 (23.43) | 0.33 |
| <b>Assisted ventilation at day 7</b>                                     |             |             |       |  |             |             |      |
| Information missing                                                      | 3 (0.35)    | 11 (1.17)   | 9.45  |  | 2 (0.28)    | 4 (0.56)    | 4.33 |
| Yes                                                                      | 409 (48.06) | 366 (39.02) | 18.31 |  | 314 (43.79) | 282 (39.33) | 9.06 |
| <b>Patient volume of NICU where the infant was hospitalized at day 7</b> |             |             |       |  |             |             |      |
| • <20 infants                                                            | 183 (21.50) | 113 (12.05) | 25.50 |  | 124 (17.29) | 108 (15.06) | 6.06 |
| • 21-30 infants                                                          | 150 (17.63) | 227 (24.20) | 16.21 |  | 137 (19.11) | 145 (20.22) | 2.79 |
| • 31-40 infants                                                          | 132 (15.51) | 111 (11.83) | 10.73 |  | 102 (14.23) | 104 (14.50) | 0.77 |
| • >40 infants                                                            | 386 (45.36) | 487 (51.92) | 13.15 |  | 354 (49.37) | 360 (50.21) | 1.68 |

\* birth weight z-score based on Olsen's curves <sup>[40]</sup>

**Table 2. Neonatal Nutritional intake in the Non-Exposed and Exposed groups**

| Creatinemia during first week & Neonatal Nutritional intake | Propensity Score Matched Cohort |            |     |            |        |
|-------------------------------------------------------------|---------------------------------|------------|-----|------------|--------|
|                                                             | N                               | Nonexposed | N   | Exposed    | p      |
|                                                             | 717                             |            | 717 |            |        |
| <b>Maximal creatinemia between Day3 and Day7</b>            | 650                             | 85.0 (3.2) | 620 | 79.2 (2.4) | <0.001 |
| <b>Neonatal Nutritional intake</b>                          |                                 |            |     |            |        |
| <b>Day 3</b>                                                |                                 |            |     |            |        |
| Protein <sup>a</sup> (g/kg/day)                             | 704                             | 2.5 (0.8)  | 712 | 3.2 (0.7)  | <0.001 |
| Carbohydrate (g/kg/day)                                     | 706                             | 10.9 (3.0) | 714 | 11.2 (2.9) | 0.012  |
| Lipid (g/kg/day)                                            | 701                             | 1.7 (1.1)  | 705 | 2.0 (1.1)  | <0.001 |
| <b>Day 7</b>                                                |                                 |            |     |            |        |
| Protein <sup>a</sup> (g/kg/day)                             | 717                             | 3.0 (0.5)  | 717 | 4.0 (0.2)  | <0.001 |
| Carbohydrate (g/kg/day)                                     | 716                             | 13.8 (3.6) | 716 | 14.9 (3.5) | <0.001 |
| Lipid (g/kg/day)                                            | 715                             | 3.1 (1.5)  | 716 | 3.6 (1.7)  | <0.001 |
| <b>Day 28</b>                                               |                                 |            |     |            |        |
| Surviving at day 28, n (%)                                  | 717                             | 669 (93.3) | 717 | 671 (93.6) | 0.640  |
| Protein <sup>a</sup> (g/kg/day)                             | 539                             | 3.1 (0.7)  | 534 | 3.2 (0.7)  | 0.037  |
| Carbohydrate (g/kg/day)                                     | 546                             | 14.6 (3.3) | 537 | 14.3 (3.5) | 0.017  |
| Lipid (g/kg/day)                                            | 541                             | 5.1 (2.0)  | 533 | 5.2 (1.8)  | 0.725  |
| <b>Post conceptual age of 36 weeks</b>                      |                                 |            |     |            |        |
| Surviving at week 36, n (%)                                 | 717                             | 652 (90.9) | 717 | 657 (91.6) | 0.640  |
| Enteral nutrition, n (%)                                    | 652                             |            | 657 |            | 0.298  |
| • Not known                                                 |                                 | 64 (9.8)   |     | 83 (12.6)  |        |
| • Milk of own mother                                        |                                 | 229 (35.1) |     | 236 (35.9) |        |
| • Milk of own mother or maternal milk, with fortification   |                                 | 73 (11.2)  |     | 62 (9.4)   |        |
| • Infant formula for preterm infants                        |                                 | 184 (28.2) |     | 190 (28.9) |        |
| • Specific infant formula                                   |                                 | 102 (15.6) |     | 83 (12.6)  |        |
| <b>At discharge</b>                                         |                                 |            |     |            |        |
| Alive at discharge                                          | 717                             | 649 (90.5) | 717 | 651 (90.8) | 0.856  |
| Status of Breastfeeding                                     | 649                             |            | 651 |            | 0.394  |
| • Not known                                                 |                                 | 48 (7.4)   |     | 43 (6.6)   |        |
| • No breastfeeding                                          |                                 | 344 (53.0) |     | 331 (50.8) |        |
| • Partial breastfeeding                                     |                                 | 120 (20.0) |     | 118 (18.1) |        |
| • Exclusive Breastfeeding                                   |                                 | 137 (22.8) |     | 159 (24.4) |        |

Results are presented as mean (standard deviation) or n (%)

<sup>a</sup> sum of enteral protein and intravenous amino acid supply

**Table 3. Growth characteristics and blood pressure at 5 years in the Non-Exposed and Exposed groups**

| Growth characteristics and blood pressure at 5 years                  | Propensity Score Matched Cohort |              |     |              |                  |
|-----------------------------------------------------------------------|---------------------------------|--------------|-----|--------------|------------------|
|                                                                       | N                               | Nonexposed   | N   | Exposed      | p                |
|                                                                       | 717                             |              | 717 |              |                  |
| <b>At Birth</b>                                                       |                                 |              |     |              |                  |
| Gestational age (weeks)                                               | 717                             | 27.1 (1.5)   | 717 | 27.1 (1.5)   | 0.599            |
| Birth weight, (g)                                                     | 717                             | 1000 (250)   | 717 | 990 (250)    | 0.501            |
| Birth weight Z-score                                                  |                                 | -0.07(0.00)  |     | -0.07 (0.10) | 0.993            |
| Length, (cm)                                                          | 663                             | 35.4 (3.0)   | 680 | 35.6 (3.0)   | 0.566            |
| Birth length Z-score                                                  |                                 | -0.15 (0.97) |     | -0.09 (0.97) | 0.274            |
| Body mass index (BMI),                                                | 663                             | 7.9 (1.2)    | 680 | 7.8 (1.1)    | 0.123            |
| Birth BMI Z-score                                                     |                                 | 0.07 (1.13)  |     | -0.01 (1.04) | 0.186            |
| <b>At Discharge</b>                                                   |                                 |              |     |              |                  |
| Post menstrual age (weeks)                                            | 643                             | 39.0 (4.5)   | 646 | 38.8 (4.0)   | 0.340            |
| Weight, (g)                                                           | 634                             | 2730 (580)   | 638 | 2800 (600)   | 0.053            |
| Discharge weight Z-score                                              |                                 | -1.27 (0.84) |     | -1.13 (0.86) | <b>0.003</b>     |
| Length, (cm)                                                          | 612                             | 45.7 (3.2)   | 609 | 45.9 (3.2)   | 0.165            |
| Discharge length Z-score                                              |                                 | -1.92 (1.03) |     | -1.77 (1.09) | <b>0.019</b>     |
| Body mass index (BMI),                                                | 612                             | 13.0 (1.48)  | 609 | 13.1 (1.54)  | 0.154            |
| Discharge BMI Z-score                                                 |                                 | -0.04 (0.9)  |     | 0.05 (0.9)   | 0.131            |
| Delta weight Z-score between birth and discharge                      | 634                             | -1.23 (0.83) | 638 | -1.08 (0.82) | <b>&lt;0.001</b> |
| Delta length Z-score between birth and discharge                      | 557                             | -1.78 (0.99) | 566 | -1.70 (1.02) | 0.176            |
| Delta BMI Z-score between birth and discharge                         | 557                             | -0.21 (1.25) | 566 | 0.02 (1.20)  | <b>0.003</b>     |
| <b>At 5 years</b>                                                     |                                 |              |     |              |                  |
| Weight, (g)                                                           | 397                             | 18.5 (3.1)   | 408 | 19.1 (3.6)   | <b>0.008</b>     |
| Weight Z-score                                                        |                                 | -0.30 (1.13) |     | -0.07 (1.27) | <b>0.008</b>     |
| Height, (m)                                                           | 394                             | 1.11 (0.05)  | 407 | 1.12 (0.06)  | 0.140            |
| Height Z-score                                                        |                                 | -0.12 (1.11) |     | 0.03 (1.21)  | 0.067            |
| Body mass index (BMI),                                                | 394                             | 14.9 (1.6)   | 407 | 15.3 (2.0)   | <b>0.011</b>     |
| Birth BMI Z-score                                                     |                                 | -0.27 (1.12) |     | -0.12 (1.25) | 0.072            |
| Delta weight Z-score between discharge and 5 years                    | 397                             | 1.03 (1.16)  | 397 | 1.17 (1.26)  | 0.107            |
| Delta height Z-score between discharge and 5 years                    | 394                             | 1.90 (1.20)  | 394 | 1.89 (1.89)  | 0.842            |
| Delta BMI Z-score between discharge and 5 years                       | 394                             | -0.18 (1.27) | 394 | 0.30 (1.46)  | 0.051            |
| <b>All blood pressure measurements</b>                                |                                 |              |     |              |                  |
| • Systolic arterial pressure, mean (SD)                               | 385                             | 98.6 (10.4)  | 389 | 100.2 (10.6) | <b>0.036</b>     |
| • Systolic high blood pressure for sex and height, n (%)              | 384                             | 51 (13.3)    | 388 | 70 (18.0)    | 0.069            |
| • Diastolic arterial pressure, mean (SD)                              | 385                             | 58.7 (8.6)   | 389 | 59.1 (8.9)   | 0.615            |
| • Diastolic high blood pressure for sex and height, n (%)             | 384                             | 39 (10.2)    | 388 | 35 (9.0)     | 0.592            |
| <b>Blood pressure measurements by automated oscillometric methods</b> |                                 |              |     |              |                  |
| • Systolic arterial pressure, mean (SD)                               | 291                             | 99.3 (10.2)  | 308 | 101.4 (10.2) | <b>0.013</b>     |
| • Systolic high blood pressure for sex and height, n (%)              | 290                             | 39 (13.4)    | 307 | 63 (20.5)    | <b>0.022</b>     |
| • Diastolic arterial pressure, mean (SD)                              | 291                             | 59.0 (8.1)   | 308 | 59.1 (8.6)   | 0.801            |
| • Diastolic high blood pressure for sex and height, n (%)             | 290                             | 24 (8.3)     | 307 | 275(8.8)     | 0.953            |

Results are presented as mean (standard deviation) or n (%)
